# Supplementary material for: Vignettentest zur Erfassung des fachdidaktischen Wissens im Leseunterricht bei angehenden Lehrkräften
Source: Atypon-hosted journal article supplement (doi:10.1026/0012-1924/a000188), 2017-09-05
Supplement: 0012-1924_a000188_esm3.pdf [file 0012-1924_a000188_esm3.pdf]

*Elektronisches Supplement 3. Einschätzung der Vignetten in der quantitativen Expertenbefragung*

Einschätzung der Expertinnen und Experten

(1 = *Trifft überhaupt nicht zu*, 6 = *Trifft voll und ganz zu*)

| Vignettenkurztitel            | Die Situation ist fachdidaktisch relevant. |          |           | Die Situation ist nah am Unterrichtsalltag. |          |           | Die Situation ist eindeutig beschrieben. |          |           |
|-------------------------------|--------------------------------------------|----------|-----------|---------------------------------------------|----------|-----------|------------------------------------------|----------|-----------|
|                               | <i>N</i>                                   | <i>M</i> | <i>SD</i> | <i>N</i>                                    | <i>M</i> | <i>SD</i> | <i>N</i>                                 | <i>M</i> | <i>SD</i> |
| Leseflüssigkeit steigern      | 40                                         | 5.45     | 0.99      | 40                                          | 5.20     | 1.18      | 39                                       | 5.28     | 1.07      |
| Buch auswählen                | 42                                         | 4.95     | 1.29      | 42                                          | 4.79     | 1.30      | 41                                       | 5.37     | 0.94      |
| Lesetrainer und Lesesportler  | 34                                         | 5.32     | 0.77      | 34                                          | 4.50     | 1.24      | 34                                       | 5.21     | 1.04      |
| Emil und die Detektive        | 37                                         | 5.43     | 0.93      | 37                                          | 5.41     | 0.93      | 36                                       | 5.42     | 0.84      |
| Ich verstehe den Satz nicht   | 44                                         | 5.30     | 0.82      | 44                                          | 5.05     | 1.03      | 42                                       | 5.33     | 1.14      |
| Die Bücherkiste               | 42                                         | 5.60     | 0.59      | 42                                          | 5.24     | 1.10      | 42                                       | 5.38     | 1.03      |
| Ich kapiere die Bücher eh nie | 33                                         | 5.24     | 1.09      | 33                                          | 5.30     | 0.81      | 33                                       | 5.52     | 0.76      |
| Die Fragen sind voll schwer   | 34                                         | 5.59     | 0.66      | 34                                          | 5.65     | 0.54      | 34                                       | 5.47     | 0.83      |
| Lesestrategien Mindmap        | 33                                         | 5.58     | 0.71      | 34                                          | 5.62     | 0.60      | 33                                       | 5.42     | 0.94      |
| Gruppenarbeit Klimawandel     | 41                                         | 5.61     | 0.80      | 41                                          | 5.46     | 0.95      | 41                                       | 5.12     | 1.29      |
| Kurzgeschichte Freundschaft   | 42                                         | 5.55     | 0.71      | 41                                          | 5.46     | 0.71      | 41                                       | 5.02     | 1.17      |
| Textschwierigkeit Diagramm    | 34                                         | 5.65     | 0.49      | 34                                          | 5.24     | 0.92      | 34                                       | 5.03     | 1.22      |

*Anmerkung.* Es werden nur die 12 Vignetten des finalen Testinstruments dargestellt.
