# Supplementary material for: Vignettentest zur Erfassung des fachdidaktischen Wissens im Leseunterricht bei angehenden Lehrkräften
Source: Atypon-hosted journal article supplement (doi:10.1026/0012-1924/a000188), 2017-09-05
Supplement: 0012-1924_a000188_esm4.pdf [file 0012-1924_a000188_esm4.pdf]

*Elektronisches Supplement 4.* Deskriptive Statistiken der Besetzung der Punktekategorien für die einzelnen Vignetten

|             | Punktzahl |     |     |     |     | <i>M</i> | <i>SD</i> | <i>N</i> |
|-------------|-----------|-----|-----|-----|-----|----------|-----------|----------|
|             | 0         | 1   | 2   | 3   | 4   |          |           |          |
| Vignette 1  | 19        | 89  | 365 | 84  | 21  | 1.99     | 0.76      | 578      |
| Vignette 2  | 28        | 209 | 232 | 90  | 19  | 1.76     | 0.89      | 578      |
| Vignette 3  | 18        | 46  | 239 | 221 | 54  | 2.43     | 0.88      | 578      |
| Vignette 4  | 33        | 104 | 283 | 99  | 59  | 2.08     | 0.99      | 578      |
| Vignette 5  | 8         | 114 | 234 | 122 | 100 | 2.33     | 1.02      | 578      |
| Vignette 6  | 45        | 106 | 281 | 92  | 54  | 2.01     | 1.01      | 578      |
| Vignette 7  | 35        | 118 | 333 | 86  | 6   | 1.84     | 0.78      | 578      |
| Vignette 8  | 26        | 106 | 256 | 144 | 36  | 2.13     | 0.96      | 578      |
| Vignette 9  | 22        | 67  | 241 | 151 | 97  | 2.40     | 1.02      | 578      |
| Vignette 10 | 40        | 107 | 270 | 108 | 53  | 2.05     | 1.01      | 578      |
| Vignette 11 | 42        | 107 | 261 | 121 | 47  | 2.04     | 1.01      | 578      |
| Vignette 12 | 22        | 108 | 293 | 100 | 55  | 2.10     | 0.94      | 578      |

*Anmerkungen.* Dargestellt ist die absolute Anzahl an Probandinnen und Probanden, die die jeweilige Punktzahl pro Vignetten erreicht haben. Des Weiteren werden der Mittelwert sowie die Standardabweichung für die einzelnen Vignetten angegeben.
