# Supplementary material for: Vignettentest zur Erfassung des fachdidaktischen Wissens im Leseunterricht bei angehenden Lehrkräften
Source: Atypon-hosted journal article supplement (doi:10.1026/0012-1924/a000188), 2017-09-05
Supplement: 0012-1924_a000188_esm6.pdf [file 0012-1924_a000188_esm6.pdf]

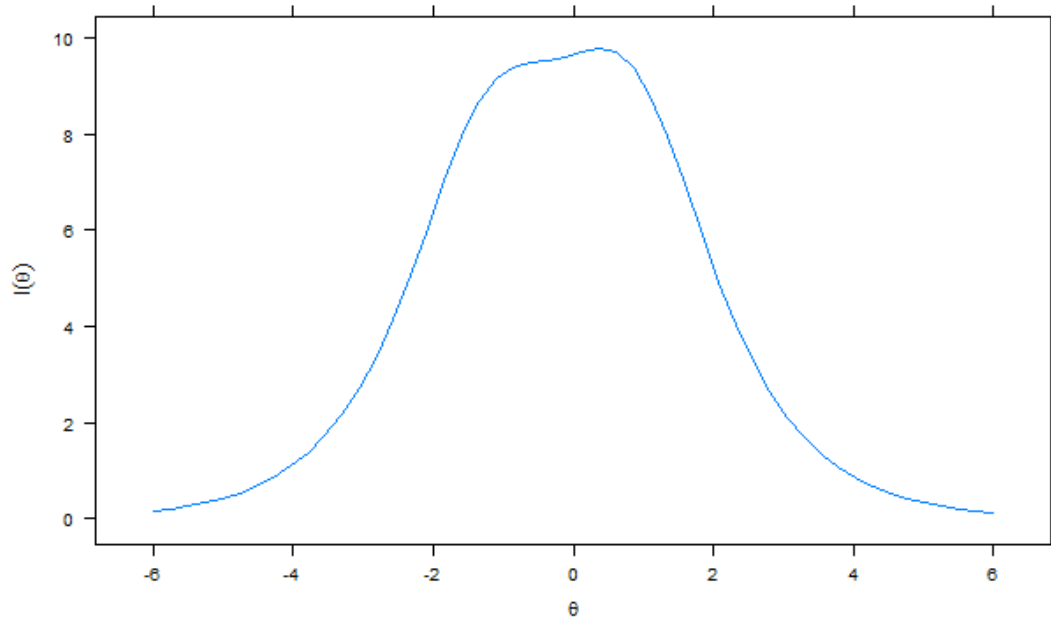

*Elektronisches Supplement 6.* Darstellung der Testinformationsfunktion für den Vignettentest
